# Supplementary material for: SARS-CoV-2 live virus neutralization after four COVID-19 vaccine doses in people with HIV receiving suppressive antiretroviral therapy
Source: PubMed Central journal article supplement — AIDS. 2023 Feb 14;37(5):F11–8. doi: 10.1097/QAD.0000000000003519 (PMC9994812; doi:10.1097/qad.0000000000003519), 2023-02-14
Supplement: aids-37-f11-s001.pdf [file aids-37-f11-s001.pdf]

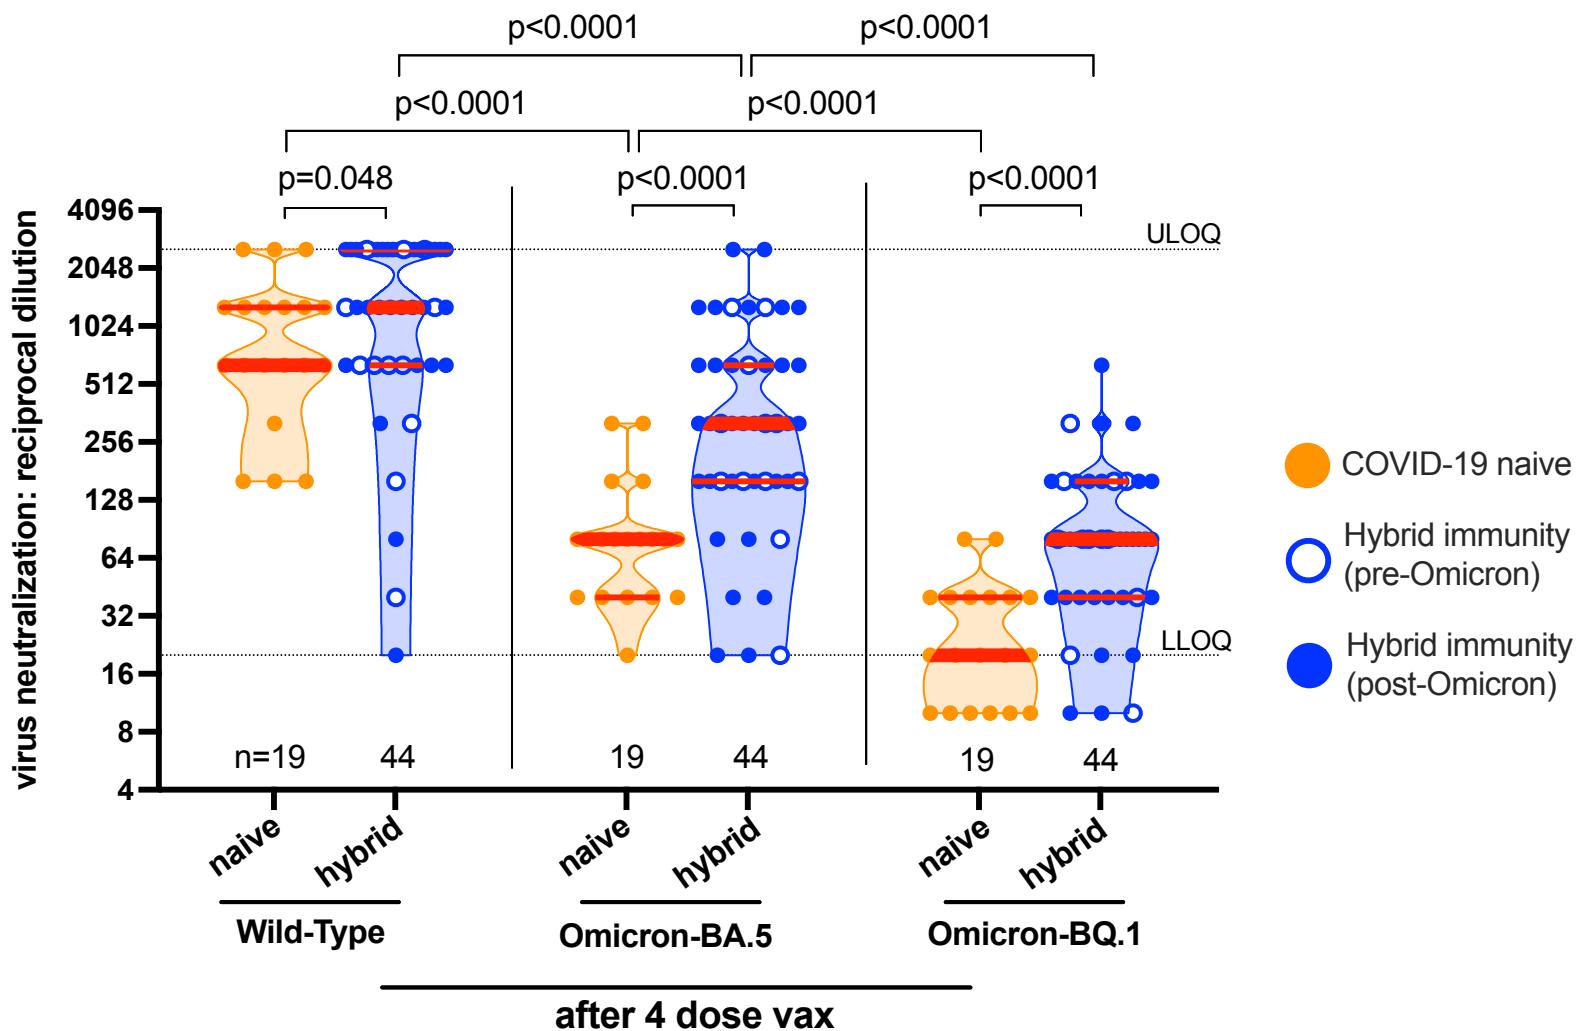

**Figure S1. WT-, Omicron-BA.5- and Omicron-BQ.1-specific viral neutralization one month following four-dose COVID-19 vaccination in PWH, stratified by COVID-19 status.** These are the same data as shown in Figure 1B, but where participants are further stratified by COVID-19 status. Specifically, COVID-19-naive PWH are in orange and COVID-19-experienced PWH (labeled "hybrid immunity") are in blue, with pre-Omicron-era infections in open blue circles and Omicron-era infections in closed blue circles. Comparisons between independent groups were performed using the Mann-Whitney U-test, while comparisons within groups across viral variants were performed using the Wilcoxon matched pairs signed rank test, where for the latter, p-values are only computed on the subset of data that constitute linked pairs. Thick red bars indicate the median and thinner bars indicate the IQR. Occasionally, the median and one of the quartiles are superimposed. P-values are not corrected for multiple comparisons.
